# Supplementary material
Source: publisher site journal article supplement (https://www.dovepress.com/get_supplementary_file.php?f=443361.docx)
Supplement: Supplementary file 1 [file get_supplementary_file.php]

**Supplemental Table S1. Summary of Most Prevalent ICD-10-CM Codes for the Study Cohort**

| **ICD-10-CM** | **Description** | **Prevalence** |
| --- | --- | --- |
| N39.0 | Urinary tract infection, site not specified | 76.0% (n = 977) |
| R30.0 | Dysuria | 8.1% (n = 104) |
| R31.0 | Gross hematuria | 3.3% (n = 42) |
| Z87.440 | Personal history of urinary (tract) infections | 1.8% (n = 23) |
| R31.9 | Hematuria, unspecified | 1.2% (n = 16) |
| Other | - | 9.5% (n = 122) |

**Supplemental Table S2. Organisms Targeted by the M-PCR Test and Their Characteristics.**

| Supplemental Table S2  Microorganism | Characteristics (gram-negative, gram-positive, fastidious, yeast) | Classification  (Classical or Emerging) | | References |
| --- | --- | --- | --- | --- |
| *Acinetobacter baumannii** | gram-negative | | emerging | 1–6 |
| *Actinotignum schaalii* | fastidious | | emerging | 7–13 |
| *Aerococcus urinae* | fastidious | | emerging | 10,14–17 |
| *Alloscardovia omnicolens* | fastidious | | emerging | 10,11,18–20 |
| *Candida albicans* | yeast | | classical | 21–24 |
| *Candida auris* | yeast | | classical | 25,26 |
| *Candida glabrata* | yeast | | classical | 23,27–29 |
| *Candida parapsilosis* | yeast | | classical | 23,30–32 |
| *Citrobacter freundii** | gram-negative | | classical | 33–35 |
| *Citrobacter koseri** | gram-negative | | classical | 35,36 |
| *Corynebacterium riegelii* | fastidious | | emerging | 37,38 |
| *Enterococcus faecalis** | gram-positive | | classical | 39–42 |
| *Enterococcus faecium* | gram-positive | | classical | 42–44 |
| *Escherichia coli** | gram-negative | | classical | 45–47 |
| *Gardnerella vaginalis* | fastidious | | emerging | 11,46–48 |
| *Klebsiella oxytoca** | gram-negative | | classical | 49,50 |
| *Klebsiella pneumoniae** | gram-negative | | classical | 49,51 |
| *Morganella morganii** | gram-negative | | classical | 52–54 |
| *Mycoplasma hominis* | fastidious | | emerging | 55 |
| *Pantoea agglomerans** | gram-negative | | classical | 56,57 |
| *Proteus mirabilis** | gram-negative | | classical | 58 |
| *Providencia stuartii** | gram-negative | | classical | 59 |
| *Pseudomonas aeruginosa** | gram-negative | | classical | 60,61 |
| *Serratia marcescens** | gram-negative | | classical | 62,63 |
| *Staphylococcus aureus** | gram-positive | | classical | 64–66 |
| *Streptococcus agalactiae** | gram-positive | | classical | 67,68 |
| *Ureaplasma urealyticum* | fastidious | | emerging | 69–72 |
| Coagulase-negative *Staphylococcus* (CoNS)* [S*taphylococcus epidermidis, Staphylococcus haemolyticus, Staphylococcus lugdunenesis, Staphylococcus saprophyticus]* | gram-positive | | emerging | 73–75 |
| Viridans group *Streptococcus (*VGS) [S*treptococcus anginosus,* *Streptococcus oralis, Streptococcus pasteuranus]* | gram-positive | | emerging | 76,77 |
| *Enterobacter* Group*  [*Klebsiella aerogenes* (formally known as *Enterobacter aerogenes*), *Enterobacter cloacae*] | gram-negative | | classical | 78 |

*Will be followed by P-AST testing if detected

**Supplemental Table S3. Biomarker Positivity by Individual Organism**

| **Supplemental Table S3** | **M-PCR Positive** | **Biomarker Positive** | | | |
| --- | --- | --- | --- | --- | --- |
| **Organisms as Detected at Density**  **> 10,000 by M-PCR** | **n (%)** | **Consensus n (%)** | **NGAL n (%)** | **IL-8 n (%)** | **IL-1β n (%)** |
| *Overall* | 823 (73%) | 661 (80%) | 670 (81%) | 709 (86%) | 529 (64%) |
| *Escherichia coli* | 336 (41%) | 289 (86%) | 289 (86%) | 305 (91%) | 243 (72%) |
| *Aerococcus urinae* | 224 (27%) | 180 (80%) | 192 (86%) | 193 (86%) | 142 (63%) |
| *Actinobaculum schaalii* | 222 (27%) | 182 (82%) | 196 (88%) | 193 (87%) | 140 (63%) |
| *Enterococcus faecalis* | 177 (22%) | 134 (76%) | 134 (76%) | 153 (86%) | 103 (58%) |
| Viridans Group  *Streptococcus* | 160 (19%) | 120 (75%) | 125 (78%) | 130 (81%) | 90 (56%) |
| *Klebsiella pneumoniae* | 111 (13%) | 97 (87%) | 96 (86%) | 101 (91%) | 76 (68%) |
| *Gardnerella vaginalis* | 71 (9%) | 47 (66%) | 48 (68%) | 57 (80%) | 29 (41%) |
| Coagulase Negative  *Staphylococcus* | 49 (6%) | 41 (84%) | 45 (92%) | 42 (86%) | 36 (73%) |
| *Pseudomonas aeruginosa* | 35 (4%) | 33 (94%) | 34 (97%) | 33 (94%) | 29 (83%) |
| *Proteus mirabilis* | 34 (4%) | 32 (94%) | 30 (88%) | 33 (97%) | 26 (76%) |
| *Alloscardovia omnicolens* | 27 (3%) | 21 (78%) | 20 (74%) | 22 (81%) | 13 (48%) |
| *Enterobacter* Group | 26 (3%) | 23 (88%) | 22 (85%) | 24 (92%) | 19 (73%) |
| *Streptococcus agalactiae* | 24 (3%) | 20 (83%) | 20 (83%) | 20 (83%) | 17 (71%) |
| *Candida glabrata* | 22 (3%) | 19 (86%) | 20 (91%) | 19 (86%) | 18 (82%) |
| *Enterococcus faecium* | 20 (2%) | 17 (85%) | 18 (90%) | 18 (90%) | 9 (45%) |
| *Candida albicans* | 15 (2%) | 13 (87%) | 14 (93%) | 13 (87%) | 11 (73%) |
| *Ureaplasma urealyticum* | 13 (2%) | 11 (85%) | 10 (77%) | 12 (92%) | 9 (69%) |
| *Klebsiella oxytoca* | 12 (1%) | 11 (92%) | 11 (92%) | 11 (92%) | 11 (92%) |
| *Morganella morganii* | 11 (1%) | 11 (100%) | 11 (100%) | 11 (100%) | 9 (82%) |
| *Citrobacter freundii* | 10 (1%) | 9 (90%) | 9 (90%) | 8 (80%) | 7 (70%) |
| *Corynebacterium riegelii* | 8 (1%) | 7 (88%) | 8 (100%) | 7 (88%) | 5 (62%) |
| *Staphylococcus aureus* | 8 (1%) | 7 (88%) | 7 (88%) | 8 (100%) | 4 (50%) |
| *Mycoplasma hominis* | 5 (1%) | 5 (100%) | 5 (100%) | 4 (80%) | 5 (100%) |
| *Citrobacter koseri* | 3 (0%) | 3 (100%) | 3 (100%) | 3 (100%) | 3 (100%) |
| *Candida parapsilosis* | 2 (0%) | 2 (100%) | 2 (100%) | 2 (100%) | 1 (50%) |
| *Serratia marcescens* | 2 (0%) | 1 (50%) | 1 (50%) | 2 (100%) | 1 (50%) |
| *Candida auris* | 1 (0%) | 1 (100%) | 1 (100%) | 1 (100%) | 1 (100%) |
| *Providencia stuartii* | 1 (0%) | 0 (0%) | 0 (0%) | 1 (100%) | 0 (0%) |
| *Acinetobacter baumannii* | 0 (0%) | 0 (NA) | 0 (NA) | 0 (NA) | 0 (NA) |
| *Pantoea agglomerans* | 0 (0%) | 0 (NA) | 0 (NA) | 0 (NA) | 0 (NA) |

**Supplemental Table S4. Biomarker Positivity in Cumulative Most Prevalent Organisms**

| **Supplemental Table S4** | **M-PCR Positive** | **Biomarker Positive** | | | |
| --- | --- | --- | --- | --- | --- |
| **Organisms as Detected at Density > 10,000 by M-PCR** | **n (%)** | **Consensus n (%)** | **NGAL n (%)** | **IL-8 n (%)** | **IL-1β n (%)** |
| Overall | 823 (73%) | 661 (80%) | 670 (81%) | 709 (86%) | 529 (64%) |
| Top 5 (*Escherichia coli, Aerococcus urinae, Actinobaculum schaalii, Enterococcus faecalis,* Viridans Group *Streptococcus*) | 648 (79%) | 517 (80%) | 526 (81%) | 556 (86%) | 415 (64%) |
| Top 10 (*Escherichia coli, Aerococcus urinae, Actinobaculum schaalii, Enterococcus faecalis, Viridans Group Streptococcus, Klebsiella pneumoniae, Gardnerella vaginalis,* Coagulase Negative *Staphylococcus, Pseudomonas aeruginosa, Proteus mirabilis*) | 763 (93%) | 609 (80%) | 617 (81%) | 655 (86%) | 491 (64%) |
| Top 15 (*Escherichia coli, Aerococcus urinae, Actinobaculum schaalii, Enterococcus faecalis,* Viridans Group *Streptococcus, Klebsiella pneumoniae, Gardnerella vaginalis, Coagulase Negative Staphylococcus, Pseudomonas aeruginosa, Proteus mirabilis, Alloscardovia omnicolens, Enterobacter* Group*, Streptococcus agalactiae, Candida glabrata, Enterococcus faecium*) | 800 (97%) | 641 (80%) | 648 (81%) | 688 (86%) | 512 (64%) |
| Top 20 (*Escherichia coli, Aerococcus urinae, Actinobaculum schaalii, Enterococcus faecalis,* Viridans Group *Streptococcus, Klebsiella pneumoniae, Gardnerella vaginalis,* Coagulase Negative *Staphylococcus, Pseudomonas aeruginosa, Proteus mirabilis, Alloscardovia omnicolens, Enterobacter* Group*, Streptococcus agalactiae, Candida glabrata, Enterococcus faecium, Candida albicans, Ureaplasma urealyticum, Klebsiella oxytoca, Morganella morganii, Citrobacter freundii*) | 816 (99%) | 655 (80%) | 664 (81%) | 702 (86%) | 523 (64%) |
| Top 25 (*Escherichia coli, Aerococcus urinae, Actinobaculum schaalii, Enterococcus faecalis,* Viridans Group *Streptococcus, Klebsiella pneumoniae, Gardnerella vaginalis,* Coagulase Negative *Staphylococcus, Pseudomonas aeruginosa, Proteus mirabilis, Alloscardovia omnicolens, Enterobacter* Group*, Streptococcus agalactiae, Candida glabrata, Enterococcus faecium, Candida albicans, Ureaplasma urealyticum, Klebsiella oxytoca, Morganella morganii, Citrobacter freundii, Corynebacterium riegelii, Staphylococcus aureus, Mycoplasma hominis, Citrobacter koseri, Candida parapsilosis*) | 822 (100%) | 661 (80%) | 670 (82%) | 708 (86%) | 529 (64%) |
| Top 30 (*Escherichia coli, Aerococcus urinae, Actinobaculum schaalii, Enterococcus faecalis,* Viridans Group *Streptococcus, Klebsiella pneumoniae, Gardnerella vaginalis,* Coagulase Negative *Staphylococcus, Pseudomonas aeruginosa, Proteus mirabilis, Alloscardovia omnicolens, Enterobacter* Group*, Streptococcus agalactiae, Candida glabrata, Enterococcus faecium, Candida albicans, Ureaplasma urealyticum, Klebsiella oxytoca, Morganella morganii, Citrobacter freundii, Corynebacterium riegelii, Staphylococcus aureus, Mycoplasma hominis, Citrobacter koseri, Candida parapsilosis, Serratia marcescens, Candida auris, Providencia stuartii, Acinetobacter baumannii, Pantoea agglomerans*) | 823 (100%) | 661 (80%) | 670 (81%) | 709 (86%) | 529 (64%) |

**Supplemental Table S5A. Biomarker Positivity in M-PCR Positive Versus Negative Cases**

| **Total**  **n = 1132** |  | |  | **Consensus** | |  | **NGAL** | | | |  | **IL-8** | | | |  | **IL-1β** | | | |
| --- | --- | --- | --- | --- | --- | --- | --- | --- | --- | --- | --- | --- | --- | --- | --- | --- | --- | --- | --- | --- |
| **n** | **% of total** |  | **% Positive (n)** | **p-value vs. Negative** |  | **% Positive (n)** | **Median (ng/mL)** | **Mean (ng/mL)** | **p-value vs. Negative** |  | **% Positive (n)** | **Median (pg/mL)** | **Mean (pg/mL)** | **p-value vs. Negative** |  | **% Positive (n)** | **Median (pg/mL)** | **Mean (pg/mL)** | **p-value vs. Negative** |
| **M-PCR**  **Negative cases** | 309 | 27 |  | 35%  (108) |  |  | 39% (119) | 24.6 | 87.9 |  |  | 50% (156) | 22.3 | 254.3 |  |  | 22% (67) | 3.9 | 26.3 |  |
| **M-PCR**  **Positive cases** | 823 | 73 |  | 80%  (661) | **<0.0001** |  | 81% (670) | 200.1 | 242.9 | **<0.0001** |  | 86% (709) | 255.2 | 566.2 | **<0.0001** |  | 64% (529) | 33.5 | 78.7 | **<0.0001** |

**Supplemental Table S5B. Biomarker Positivity in M-PCR Positive Cases Grouped by Organism and Infection Characteristics**

| **Total**  **n = 823** |  | |  | **Consensus** | |  | **NGAL** | | | |  | **IL-8** | | | |  | **IL-1β** | | | |
| --- | --- | --- | --- | --- | --- | --- | --- | --- | --- | --- | --- | --- | --- | --- | --- | --- | --- | --- | --- | --- |
| **n** | **% of total** |  | **% Positive (n)** | **p-value vs. Negative** |  | **% Positive (n)** | **Median (ng/mL)** | **Mean (ng/mL)** | **p-value vs. Negative** |  | **% Positive (n)** | **Median (pg/mL)** | **Mean (pg/mL)** | **p-value vs. Negative** |  | **% Positive (n)** | **Median (pg/mL)** | **Mean (pg/mL)** | **p-value vs. Negative** |
| **Mono-microbial cases** | 301 | 37 |  | 82%  (246) | **<0.0001** |  | 37% (301) | 232.9 | 260.5 | **<0.0001** |  | 89% (269) | 365.5 | 687.2 | **<0.0001** |  | 67% (201) | 54.2 | 93.1 | **<0.0001** |
| **Polymicrobial cases** | 522 | 63 |  | 80%  (415) | **<0.0001** |  | 63% (522) | 176.5 | 232.8 | **<0.0001** |  | 84% (440) | 211.7 | 496.4 | **<0.0001** |  | 63% (328) | 26.9 | 70.5 | **<0.0001** |
| **Cases with  *E. coli*** | 336 | 41 |  | 86%  (289) | **<0.0001** |  | 86% (289) | 271.0 | 274.2 | **<0.0001** |  | 91% (305) | 315.4 | 599.7 | **<0.0001** |  | 86% (289) | 46.2 | 92.4 | **<0.0001** |
| **Cases without *E. coli*** | 487 | 59 |  | 76%  (372) | **<0.0001** |  | 78% (381) | 159.1 | 221.4 | **<0.0001** |  | 83% (404) | 212.5 | 543.1 | **<0.0001** |  | 76% (372) | 23.4 | 69.4 | **<0.0001** |
| **Cases with only emerging organisms** | 109 | 13 |  | 74%  (81) | **<0.0001** |  | 83% (90) | 157.1 | 201.8 | **<0.0001** |  | 78% (85) | 219.4 | 534.2 | **<0.0001** |  | 55% (60) | 17.3 | 64.7 | **<0.0001** |
| **Cases with only classical organisms** | 442 | 54 |  | 78%  (345) | **<0.0001** |  | 76% (337) | 195.0 | 240.2 | **<0.0001** |  | 86% (379) | 233.9 | 570.4 | **<0.0001** |  | 63% (280) | 38.2 | 82.1 | **<0.0001** |

Bolded values indicate p < 0.05

**References:**

1. Howard A, O’Donoghue M, Feeney A, Sleator RD. Acinetobacter baumannii. *Virulence*. 2012;3(3):243-250. doi:10.4161/viru.19700

2. Cerqueira GM, Peleg AY. Insights into Acinetobacter baumannii pathogenicity. *Iubmb Life*. 2011;63(12):1055-1060. doi:10.1002/iub.533

3. Pour NK, Dusane DH, Dhakephalkar PK, Zamin FR, Zinjarde SS, Chopade BA. Biofilm formation by Acinetobacter baumannii strains isolated from urinary tract infection and urinary catheters. *Fems Immunol Medical Microbiol*. 2011;62(3):328-338. doi:10.1111/j.1574-695x.2011.00818.x

4. Bagińska N, Cieślik M, Górski A, Jończyk-Matysiak E. The Role of Antibiotic Resistant A. baumannii in the Pathogenesis of Urinary Tract Infection and the Potential of Its Treatment with the Use of Bacteriophage Therapy. *Antibiotics*. 2021;10(3):281. doi:10.3390/antibiotics10030281

5. Bian X, Liu X, Zhang X, et al. Epidemiological and genomic characteristics of Acinetobacter baumannii from different infection sites using comparative genomics. *Bmc Genomics*. 2021;22(1):530. doi:10.1186/s12864-021-07842-5

6. Al-Dahmoshi HOM, Al-Khafaji NSK, Al-Alaq FT. Urinary Tract Infections - the Imbalance Between the Pathogen Virulence and the Host Defense [Working Title]. Published online 2020. doi:10.5772/intechopen.94508

7. Horton LE, Mehta SR, Aganovic L, Fierer J. Actinotignum schaalii Infection: A Clandestine Cause of Sterile Pyuria? *Open Forum Infect Dis*. 2018;5(2):ofy015. doi:10.1093/ofid/ofy015

8. Cattoir V. Actinobaculum schaalii: Review of an emerging uropathogen. *Journal of Infection*. 2012;64(3):260-267. doi:10.1016/j.jinf.2011.12.009

9. Lieu A, Mah J, Church D. 1361. Actinotignum schaalii an Under-recognized Cause of Infections: A Case Series in Calgary from 2012 - 2020. *Open Forum Infect Dis*. 2021;8(Supplement_1):S766-S767. doi:10.1093/ofid/ofab466.1553

10. Lainhart W, Gonzalez MD. Aerococcus urinae, Alloscardovia omnicolens, and Actinotignum schaalii: the AAA Minor League Team of Urinary Tract Infection Pathogens. *Clinical Microbiology Newsletter*. 2018;40(10):77-82. doi:10.1016/j.clinmicnews.2018.05.001

11. Klein S, Nurjadi D, Horner S, Heeg K, Zimmermann S, Burckhardt I. Significant increase in cultivation of Gardnerella vaginalis, Alloscardovia omnicolens, Actinotignum schaalii, and Actinomyces spp. in urine samples with total laboratory automation. *Eur J Clin Microbiol Infect Dis*. 2018;37(7):1305-1311. doi:10.1007/s10096-018-3250-6

12. Reinhard M, Prag J, Kemp M, et al. Ten Cases of Actinobaculum schaalii Infection: Clinical Relevance, Bacterial Identification, and Antibiotic Susceptibility. *J Clin Microbiol*. 2005;43(10):5305-5308. doi:10.1128/jcm.43.10.5305-5308.2005

13. Lotte R, Lotte L, Ruimy R. Actinotignum schaalii (formerly Actinobaculum schaalii): a newly recognized pathogen—review of the literature. *Clin Microbiol Infec*. 2016;22(1):28-36. doi:10.1016/j.cmi.2015.10.038

14. Higgins A, Garg T. Aerococcus urinae: An Emerging Cause of Urinary Tract Infection in Older Adults with Multimorbidity and Urologic Cancer. *Urology Case Reports*. 2017;13:24-25. doi:10.1016/j.eucr.2017.03.022

15. Hilt EE, Putonti C, Thomas-White K, et al. Aerococcus urinae Isolated from Women with Lower Urinary Tract Symptoms: In Vitro Aggregation and Genome Analysis. *J Bacteriol*. 2020;202(13). doi:10.1128/jb.00170-20

16. Bradley ES, Schell B, Ward DV, Bucci V, Zeamer A, Haran JP. The Urinary Microbiome of Older Adults Residing in a Nursing Home Varies with Duration of Residence and Shows Increases in Potential Pathogens. *Journals Gerontology Ser*. Published online 2021. doi:10.1093/gerona/glab345

17. Meletis G, Chatzidimitriou D, Tsingerlioti F, Chatzopoulou F, Tzimagiorgis G. An initially unidentified case of urinary tract infection due to Aerococcus urinae. *New Microbiol*. 2017;40(3):221-222.

18. Huys G, Vancanneyt M, D’Haene K, Falsen E, Wauters G, Vandamme P. Alloscardovia omnicolens gen. nov., sp. nov., from human clinical samples. *Int J Syst Evol Micr*. 2007;57(7):1442-1446. doi:10.1099/ijs.0.64812-0

19. Brown MK, Forbes BA, Stitley K, Doern CD. Defining the Clinical Significance of Alloscardovia omnincolens in the Urinary Tract. *J Clin Microbiol*. 2016;54(6):1552-1556. doi:10.1128/jcm.03084-15

20. Isnard C, Lienhard R, Reissier S, et al. In vitro antimicrobial susceptibility of Alloscardovia omnicolens and molecular mechanisms of acquired resistance. *Diagnostic Microbiology and Infectious Disease*. 2016;84(3):227-229. doi:10.1016/j.diagmicrobio.2015.08.009

21. Erdogan A, Rao SSC. Small Intestinal Fungal Overgrowth. *Curr Gastroenterology Reports*. 2015;17(4):16. doi:10.1007/s11894-015-0436-2

22. Lal S, Parkash O, Kumar P, et al. Determination of Predisposing Factors in Developing Candida albicans Associated Urinary Tract Infection and Antifungal Sensitivity Profile. *J Pharm Res Int*. Published online 2021:40-49. doi:10.9734/jpri/2021/v33i631188

23. Cui H. Distribution and drug resistance of pathogens causing urinary tract infection in patients with urinary calculi. *Am J Transl Res*. 2021;13(9):10554-10561.

24. Shing SR, Ramos AR, Patras KA, et al. The Fungal Pathogen Candida albicans Promotes Bladder Colonization of Group B Streptococcus. *Front Cell Infect Mi*. 2020;9:437. doi:10.3389/fcimb.2019.00437

25. Griffith N, Danziger L. Candida auris Urinary Tract Infections and Possible Treatment. *Antibiotics*. 2020;9(12):898. doi:10.3390/antibiotics9120898

26. Dias V. Candida species in the urinary tract: is it a fungal infection or not? *Future Microbiol*. 2020;15(2):81-83. doi:10.2217/fmb-2019-0262

27. Fidel PL, Vazquez JA, Sobel JD. Candida glabrata : Review of Epidemiology, Pathogenesis, and Clinical Disease with Comparison to C. albicans. *Clin Microbiol Rev*. 1999;12(1):80-96. doi:10.1128/cmr.12.1.80

28. Pappas PG, Kauffman CA, Andes DR, et al. Clinical Practice Guideline for the Management of Candidiasis: 2016 Update by the Infectious Diseases Society of America. *Clin Infect Dis*. 2016;62(4):e1-e50. doi:10.1093/cid/civ933

29. Odabasi Z, Mert A. Candida urinary tract infections in adults. *World J Urol*. 2020;38(11):2699-2707. doi:10.1007/s00345-019-02991-5

30. Bliss JM, Tollefson GA, Cuevas A, et al. Transcription Profiles Associated with Inducible Adhesion in Candida parapsilosis. *Msphere*. 2021;6(1):e01071-20. doi:10.1128/msphere.01071-20

31. Trofa D, Gácser A, Nosanchuk JD. Candida parapsilosis , an Emerging Fungal Pathogen. *Clin Microbiol Rev*. 2008;21(4):606-625. doi:10.1128/cmr.00013-08

32. Fisher JF, Sobel JD, Kauffman CA, Newman CA. Candida Urinary Tract Infections—Treatment. *Clin Infect Dis*. 2011;52(suppl_6):S457-S466. doi:10.1093/cid/cir112

33. Wang JT, Chang SC, Chen YC, Luh KT. Comparison of antimicrobial susceptibility of Citrobacter freundii isolates in two different time periods. *J Microbiol Immunol Infect Wei Mian Yu Gan Ran Za Zhi*. 2000;33(4):258-262.

34. Whalen JG, Mully TW, English JC. Spontaneous Citrobacter freundii Infection in an Immunocompetent Patient. *Arch Dermatol*. 2007;143(1):115-126. doi:10.1001/archderm.143.1.124

35. Ranjan KP, Ranjan N. Citrobacter: An emerging health care associated urinary pathogen. *Urology Ann*. 2013;5(4):313-314.

36. Deveci A, Coban AY. Optimum management of Citrobacter koseri infection. *Expert Rev Anti-infe*. 2014;12(9):1137-1142. doi:10.1586/14787210.2014.944505

37. Aygun G, Midilli K, Cilingir H, Yilmaz M, Kutukcu A, Eker E. A fatal case of urosepsis due to Corynebacterium riegelii. *Brazilian Journal of Microbiology*. 2013;44(2):475-476. doi:10.1590/s1517-83822013000200022

38. Funke G, Lawson P, Collins M. Corynebacterium riegelii sp. nov., an unusual species isolated from female patients with urinary tract infections. *Journal of clinical microbiology*. Published online 1998:624-627.

39. Hidron AI, Edwards JR, Patel J, et al. Antimicrobial-Resistant Pathogens Associated With Healthcare-Associated Infections: Annual Summary of Data Reported to the National Healthcare Safety Network at the Centers for Disease Control and Prevention, 2006–2007. *Infect Control Hosp Epidemiology*. 2008;29(11):996-1011. doi:10.1086/591861

40. Huycke MM, Spiegel CA, Gilmore MS. Bacteremia caused by hemolytic, high-level gentamicin-resistant Enterococcus faecalis. *Antimicrob Agents Ch*. 1991;35(8):1626-1634. doi:10.1128/aac.35.8.1626

41. Chow JW, Thal LA, Perri MB, et al. Plasmid-associated hemolysin and aggregation substance production contribute to virulence in experimental enterococcal endocarditis. *Antimicrob Agents Ch*. 1993;37(11):2474-2477. doi:10.1128/aac.37.11.2474

42. Álvarez-Artero E, Campo-Nuñez A, García-García I, et al. Urinary tract infection caused by Enterococcus spp.: Risk factors and mortality. An observational study. *Revista Clínica Española Engl Ed*. 2021;221(7):375-383. doi:10.1016/j.rceng.2020.09.004

43. Kline KA, Lewis AL. Gram-Positive Uropathogens, Polymicrobial Urinary Tract Infection, and the Emerging Microbiota of the Urinary Tract. *Microbiol Spectr*. 2016;4(2). doi:10.1128/microbiolspec.uti-0012-2012

44. Zhang Y, Wang L, Zhou C, et al. Unraveling Mechanisms and Epidemic Characteristics of Nitrofurantoin Resistance in Uropathogenic Enterococcus faecium Clinical Isolates. *Infect Drug Resist*. 2021;14:1601-1611. doi:10.2147/idr.s301802

45. Hilbert DW. Uropathogenic Escherichia coli: the pre-eminent urinary tract infection pathogen.

46. Gilbert NM, O’Brien VP, Lewis AL. Transient microbiota exposures activate dormant Escherichia coli infection in the bladder and drive severe outcomes of recurrent disease. *Plos Pathog*. 2017;13(3):e1006238. doi:10.1371/journal.ppat.1006238

47. Garretto A, Miller-Ensminger T, Ene A, et al. Genomic Survey of E. coli From the Bladders of Women With and Without Lower Urinary Tract Symptoms. *Front Microbiol*. 2020;11:2094. doi:10.3389/fmicb.2020.02094

48. Stone L. Brief encounter: UTI triggered by vaginal microbiota. *Nat Rev Urol*. 2017;14(6):328-328. doi:10.1038/nrurol.2017.60

49. Podschun R, Ullmann U. Klebsiella spp. as Nosocomial Pathogens: Epidemiology, Taxonomy, Typing Methods, and Pathogenicity Factors. *Clin Microbiol Rev*. 1998;11(4):589-603. doi:10.1128/cmr.11.4.589

50. Qureshi S. Klebsiella Infections: Background.

51. Gancz A, Kondratyeva K, Cohen-Eli D, Navon-Venezia S. Genomics and Virulence of Klebsiella pneumoniae Kpnu95 ST1412 Harboring a Novel Incf Plasmid Encoding Blactx-M-15 and Qnrs1 Causing Community Urinary Tract Infection. *Microorg*. 2021;9(5):1022. doi:10.3390/microorganisms9051022

52. BENSMAN A, ROUBACH L, ALLOUCH G, et al. UROLITHIASIS IN CHILDREN Presenting Signs, Etiology, Bacteriology and Localisation. *Acta Paediatr*. 1983;72(6):879-883. doi:10.1111/j.1651-2227.1983.tb09834.x

53. Liu H, Zhu J, Hu Q, Rao X. Morganella morganii, a non-negligent opportunistic pathogen. *Int J Infect Dis*. 2016;50:10-17. doi:10.1016/j.ijid.2016.07.006

54. Casjens SR, Thuman-Commike PA. Evolution of mosaically related tailed bacteriophage genomes seen through the lens of phage P22 virion assembly. *Virology*. 2011;411(2):393-415. doi:10.1016/j.virol.2010.12.046

55. Mian A, Sebastian S, Arif N, Soneja M, Dhawan B. A Case of Sterile Pyuria Caused by Chlamydia trachomatis and Mycoplasma hominis: A Diagnostic Challenge. *Indian J Med Microbi*. 2017;35(3):429-431. doi:10.4103/ijmm.ijmm_17_125

56. Walterson AM, Stavrinides J. Pantoea: insights into a highly versatile and diverse genus within the Enterobacteriaceae. *Fems Microbiol Rev*. 2015;39(6):968-984. doi:10.1093/femsre/fuv027

57. Cruz AT, Cazacu AC, Allen CH. Pantoea agglomerans , a Plant Pathogen Causing Human Disease. *J Clin Microbiol*. 2007;45(6):1989-1992. doi:10.1128/jcm.00632-07

58. Wasfi R, Hamed SM, Amer MA, Fahmy LI. Proteus mirabilis Biofilm: Development and Therapeutic Strategies. *Front Cell Infect Mi*. 2020;10:414. doi:10.3389/fcimb.2020.00414

59. Wie SH. Clinical significance of Providencia bacteremia or bacteriuria. *Korean J Intern Medicine*. 2015;30(2):167-169. doi:10.3904/kjim.2015.30.2.167

60. Penaranda C, Chumbler NM, Hung DT. Dual transcriptional analysis reveals adaptation of host and pathogen to intracellular survival of Pseudomonas aeruginosa associated with urinary tract infection. *Plos Pathog*. 2021;17(4):e1009534. doi:10.1371/journal.ppat.1009534

61. Lister PD, Wolter DJ, Hanson ND. Antibacterial-Resistant Pseudomonas aeruginosa : Clinical Impact and Complex Regulation of Chromosomally Encoded Resistance Mechanisms. *Clin Microbiol Rev*. 2009;22(4):582-610. doi:10.1128/cmr.00040-09

62. HEJAZI A, FALKINER FR. Serratia marcescens. *J Med Microbiol*. 1997;46(11):903-912. doi:10.1099/00222615-46-11-903

63. Su LH, Ou JT, Leu HS, et al. Extended Epidemic of Nosocomial Urinary Tract Infections Caused by Serratia marcescens. *J Clin Microbiol*. 2003;41(10):4726-4732. doi:10.1128/jcm.41.10.4726-4732.2003

64. Muder RR, Brennen C, Rihs JD, et al. Isolation of Staphylococcus aureus from the Urinary Tract: Association of Isolation with Symptomatic Urinary Tract Infection and Subsequent Staphylococcal Bacteremia. *Clin Infect Dis*. 2006;42(1):46-50. doi:10.1086/498518

65. Gajdács M, Ábrók M, Lázár A, Burián K. Increasing relevance of Gram-positive cocci in urinary tract infections: a 10-year analysis of their prevalence and resistance trends. 10(1):1-11.

66. Lowy FD. Staphylococcus aureus Infections. *New Engl J Medicine*. 1998;339(8):520-532. doi:10.1056/nejm199808203390806

67. Leclercq SY, Sullivan MJ, Ipe DS, Smith JP, Cripps AW, Ulett GC. Pathogenesis of Streptococcus urinary tract infection depends on bacterial strain and β-hemolysin/cytolysin that mediates cytotoxicity, cytokine synthesis, inflammation and virulence. 6(1):1-14.

68. Patras KA, Coady A, Babu P, et al. Host Cathelicidin Exacerbates Group B Streptococcus Urinary Tract Infection. *Msphere*. 2020;5(2):e00932-19. doi:10.1128/msphere.00932-19

69. Horner P, Thomas B, Gilroy CB, Egger M, Taylor-Robinson D. Role of Mycoplasma genitalium and Ureaplasma urealyticum in Acute and Chronic Nongonococcal Urethritis. *Clin Infect Dis*. 2001;32(7):995-1003. doi:10.1086/319594

70. Deguchi T, Yoshida T, Miyazawa T, et al. Association of Ureaplasma urealyticum (Biovar 2) With Nongonococcal Urethritis. *Sex Transm Dis*. 2004;31(3):192-195. doi:10.1097/01.olq.0000114653.26951.71

71. Hedelin H, Brorson J ‐E., Grenabo L, Pettersson S. Ureaplasma urealyticum and Upper Urinary Tract Stones. *Brit J Urol*. 1984;56(3):244-249. doi:10.1111/j.1464-410x.1984.tb05381.x

72. Elkolaly NME, Amin AM, Mohamed MZE, Abd-Elmonsef MME. Rapid Detection of Urinary Ureaplasma urealyticum and Mycoplasma hominis Isolated from Pregnant Women and Their Antibiotic Susceptibility Profile. *Infect Dis Clin Prac*. 2021;29(6):e395-e400. doi:10.1097/ipc.0000000000001044

73. Tan TY, Ng SY, Ng WX. Clinical Significance of Coagulase-Negative Staphylococci Recovered from Nonsterile Sites. *J Clin Microbiol*. 2006;44(9):3413-3414. doi:10.1128/jcm.00757-06

74. Kline KA, Ingersoll MA, Nielsen HV, et al. Characterization of a Novel Murine Model of Staphylococcus saprophyticus Urinary Tract Infection Reveals Roles for Ssp and SdrI in Virulence. *Infect Immun*. 2010;78(5):1943-1951. doi:10.1128/iai.01235-09

75. Motwani B, Khayr W. Staphylococcus saprophyticus Urinary Tract Infection in Men. *Infect Dis Clin Prac*. 2004;12(6):341-342. doi:10.1097/01.idc.0000144903.43451.82

76. Siegman-Igra Y, Azmon Y, Schwartz D. Milleri group streptococcus—a stepchild in the viridans family. *European Journal of Clinical Microbiology & Infectious Diseases*. 2012;31(9):2453-2459. doi:10.1007/s10096-012-1589-7

77. Mores CR, Price TK, Wolff B, et al. Genomic relatedness and clinical significance of Streptococcus mitis strains isolated from the urogenital tract of sexual partners. *Microb Genom*. 2021;7(3):mgen000535. doi:10.1099/mgen.0.000535

78. Thomson KS, Sanders CC, Chmel H. Imipenem resistance inEnterobacter. *European J Clin Microbiol Infect Dis*. 1993;12(8):610-613. doi:10.1007/bf01973639
